# Supplementary material
Source: publisher figshare collection journal article supplement (https://gsajournals.figshare.com/ndownloader/files/27242465)
Supplement: Supplementary file 1 [file 27242465]

Archive with 1 entries (1 files):
- 27242465.out
